# Supplementary material
Source: Elsevier journal article supplement (https://www.sciencedirect.com/science/article/pii/S030089321730605X)
Supplement: mmc1 [file S030089321730605X:mmc1.pdf]

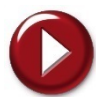

## Supplementary material

---

# The Value of the SYNTAX Score II in Predicting Clinical Outcomes in Patients Undergoing Transcatheter Aortic Valve Implantation

---

## Figure 1 of the supplementary material

Comparison of SYNTAX Score II PCI and SYNTAX Score II CABG as predictors of 30-day mortality (A) and 1-year mortality (B)

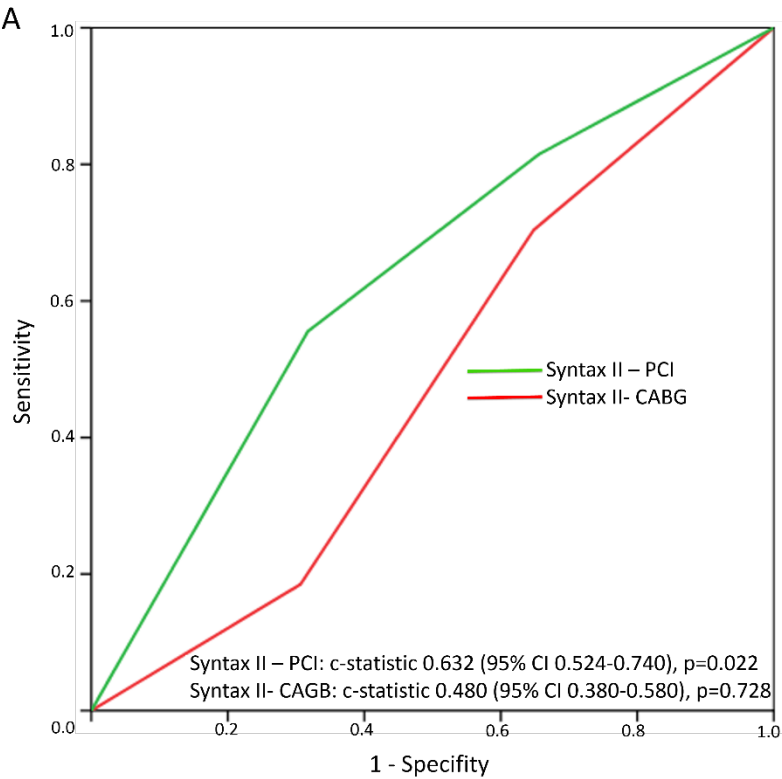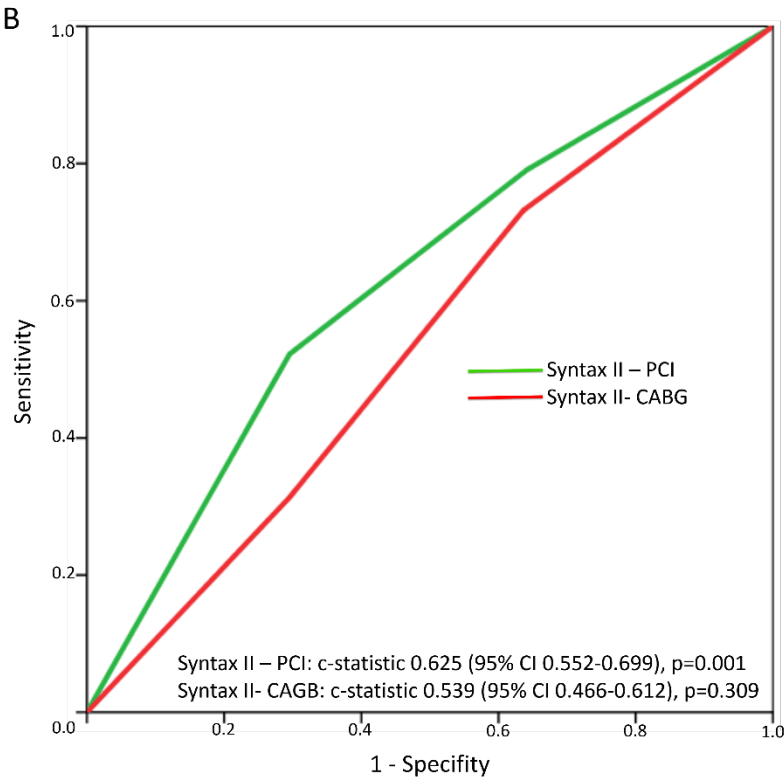

95%CI, 95% confidence interval; PCI, percutaneous coronary intervention; CABG, coronary artery bypass graft.

**Figure 2 of the supplementary material**

Time-dependent comparison of SYNTAX Score II PCI and SYNTAX Score II CABG

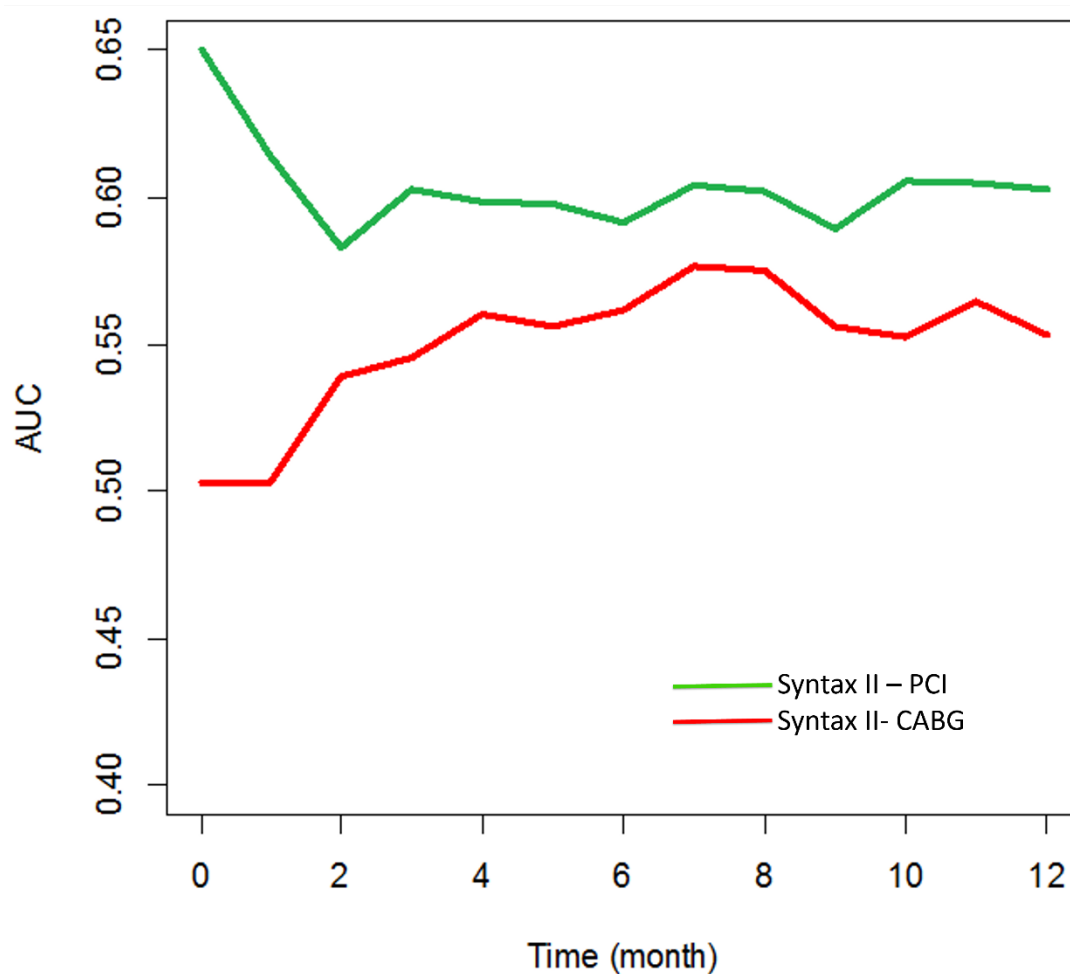

AUC, area under the curve; CABG, coronary artery bypass graft; PCI, percutaneous coronary intervention.
